# Supplementary material for: Quorum Sensing Controls the CRISPR and Type VI Secretion Systems in Aliivibrio wodanis 06/09/139
Source: Front Vet Sci. 2022 Feb 8;9:799414. doi: 10.3389/fvets.2022.799414 (PMC8861277; doi:10.3389/fvets.2022.799414)
Supplement: Supplementary file 5 [file Table_5.xlsx]

## Sheet: CRISPR regulation
Supplementary Table S5.Fold change values of CRISPR system in A. wodanis 06/09/139
	AWOD_II_0928		AWOD_II_0929		AWOD_II_0930		AWOD_II_0931		AWOD_II_0932		AWOD_II_0933		AWOD_II_0934		Chromosome 1		Chromosome 2
	csy4		csy3		csy2		csy1		cas3		cas1		TR
Comparisons	CRISPR-associated protein		CRISPR-associated protein		CRISPR-associated protein		CRISPR-associated protein		CRISPR-associated helicase		CRISPR associated protein		putative transcriptional regulator		CRISPR array 1		CRISPR array 2
Wild type(HCD/LCD)	FC	padj	FC	padj	FC	padj	FC	padj	FC	padj	FC	padj	FC	padj	FC	padj	FC	padj
(HCD/LCD) 6°C	1.70308	0.000174391	2.04813	2.32269e-07	1.83282	6.62884e-05	1.53263	0.00682112	2.41888	4.34747e-12	2.27143	1.79992e-12	1.24425	0.217754	₋1.83	1.06533e-06	1.04	0.817069
(HCD/LCD) 12°C	1.29597	0.232461	1.29746	0.101102	1.20881	0.25339	-1.08481	0.687467	1.51801	0.00173002	1.87753	0.000231749	1.02614	0.902516	₋1.83	0.000296382	₋1.26	0.275556
Wild type(12°C/6°C)
(12°C/6°C)HCD	1.33413	0.239494	-1.01	0.987867	-1.01	0.962267	-1.36	0.10127	-1.07	0.732103	1.07969	0.754661	-1.21	0.291461	₋2.10	3.49643e-06	₋1.8	0.00871753
(12°C/6°C) LCD	1.80303	2.354e-06	1.61024	0.000233804	1.53878	0.0030136	1.2491	0.149981	1.52127	0.00064213	1.32572	0.0382404	1.02147	0.920354	₋2.05	7.69555e-09	-1.32	0.0386008
∆litR/WT
(∆litR/WT)HCD_6°C	-7.79589	2.68569e-65	-11.1503	3.03458e-93	-10.3593	2.82302e-99	-10.3474	6.09547e-85	-6.11999	2.09336e-73	-10.3175	2.13506e-64	-3.20259	2.14722e-14	1.61011	0.00137285	-1.68586	0.0013343
(∆litR/WT)HCD_12°C	-7.54208	1.703e-20	-8.66289	2.49459e-44	-7.34733	3.51596e-40	-6.49833	4.89782e-28	-4.84435	2.11421e-23	-6.64814	1.23077e-21	-2.03249	0.000609534	2.00538	0.00164754	-1.14319	0.859133
(∆litR/WT)LCD_6°C	-5.54282	5.3022e-27	-4.93975	4.99687e-25	-6.24069	2.66277e-28	-5.87	1.42517e-27	-5.57482	2.02613e-26	-8.12097	2.1243e-23	-5.81449	2.80815e-13	-1.76861	0.000216166	-2.6858	1.73979e-10
(∆litR/WT)LCD_12°C	-7.20676	6.12811e-64	-7.22083	2.52025e-66	-6.54651	7.39221e-58	-7.44405	9.62178e-56	-4.86316	5.77806e-39	-5.77753	2.95764e-33	-2.70071	3.53373e-08	-1.24087	0.488746	-1.9617	0.000322083
∆ainS/WT
(∆ainS/WT)HCD_6°C	-1.67233	0.000251749	-2.05631	1.21337e-09	-1.92431	1.02798e-08	-1.86507	5.03229e-08	-1.70075	1.08833e-06	-1.51681	0.00317973	-1.36728	0.198243	1.51724	0.0125159	1.03175	0.999532
(∆ainS/WT)HCD_12°C	-1.76507	0.0235381	-1.77766	0.021373	-1.70474	0.0326149	-1.80486	0.00348715	-1.58796	0.0110917	-1.71594	0.00491173	-1.10851	0.779992	1.44427	0.178463	1.02415	0.968529
(∆ainS/WT)LCD_6°C	-1.73148	0.0657624	-1.94774	0.00591838	-1.93795	0.0105204	-1.90434	0.0223597	-1.692	0.106763	-1.51644	0.308715	-1.19851	0.999427	1.10177	0.999964	-1.05416	0.999964
(∆ainS/WT)LCD_12°C	-2.02213	5.47034e-09	-2.03264	1.6148e-08	-1.93954	1.34071e-07	-1.89878	2.55171e-06	-1.83028	2.03668e-07	-1.47826	0.0118541	-1.12013	0.690015	1.04301	0.929273	-1.1584	0.637745
